# Supplementary material for: Adeno-associated virus-mediated delivery of anti-miR-199a tough decoys attenuates cardiac hypertrophy by targeting PGC-1alpha
Source: PubMed Central journal article supplement — Mol Ther Nucleic Acids. 2020 Nov 17;23:406–17. doi: 10.1016/j.omtn.2020.11.007 (PMC7787996; doi:10.1016/j.omtn.2020.11.007), 2020-11-17
Supplement: mmc1.pdf [file mmc1.pdf]

OMTN, Volume 23

## Supplemental Information

**Adeno-associated virus-mediated delivery  
of anti-miR-199a tough decoys attenuates  
cardiac hypertrophy by targeting *PGC-1alpha***

**Hualin Yan, Hong Wang, Xiaoxia Zhu, Jianbo Huang, Yifei Li, Kaiyu Zhou, Yimin Hua, Feng Yan, Da-Zhi Wang, and Yan Luo**

**Table S1. Echocardiographic assessment of each mice group.**

|                | AAV9-EGFP  | AAV9-EGFP + ISO | AAV9-anti-miR-199a TuDs + ISO |
|----------------|------------|-----------------|-------------------------------|
| LVIDd, mm      | 3.22±0.16  | 4.06±0.26**     | 3.30±0.13##                   |
| LVIDs, mm      | 1.87±0.18  | 2.78±0.22**     | 1.90±0.18##                   |
| LVEDV, $\mu$ L | 41.82±5.10 | 72.84±10.94**   | 44.25±4.36##                  |
| LVESV, $\mu$ L | 10.86±2.61 | 29.31±5.78**    | 11.35±2.59##                  |
| LVEF, %        | 80.84±6.39 | 59.92±7.71**    | 70.05±3.19##                  |
| LVFS, %        | 48.58±6.43 | 31.69±4.96**    | 38.73±2.54##                  |
| number of mice | 8          | 8               | 8                             |

Abbreviation: LVIDd, left ventricular internal dimension in diastole; LVIDs, left ventricular internal dimension in systole; LVEDV, left ventricular end-diastolic volume; LVESV, left ventricular end- systolic volume; LVEF, left ventricular ejection fraction; LVFS, left ventricular fractional shortening. \*:  $P<0.05$ , \*\*:  $P<0.01$ , AAV9- EGFP+ISO vs. AAV9-EGFP; #:  $P<0.05$ , ##  $P<0.01$ , AAV9-anti-miR-199a TuDs +ISO vs. AAV9-EGFP +ISO.

**Table S2. The primer sequences for RT-qPCR**

| Target genes                     | Primer sequences (5'-3')                                              |
|----------------------------------|-----------------------------------------------------------------------|
| <i>Nppa</i> (ANP)                | Forward: GGGCTCCTTCTCCATCACC<br>Reverse: CTCCAATCCTGTCAATCCTACC       |
| <i>Nppb</i> (BNP)                | Forward: CTGAAGGTGCTGTCCCAGAT<br>Reverse: GTTCTTTTGTGAGGCCTTGG        |
| <i>Myh7</i> ( $\beta$ -MHC)      | Forward: CTCAGAGCTCAAGCGGGATA<br>Reverse: CCAGCCATCTCCTCTGTCA         |
| <i>Acta1</i>                     | Forward: CAAAGACAAGCTGTGCTACGTG<br>Reverse: GATGCTGTTGTAGGTGGTCTCA    |
| <i>Rps27a</i>                    | Forward: ACTCCCAAGAAGAACAAGCATA<br>Reverse: CAGTAAGTCAGACAACACTTGC    |
| <i>Rpl23</i>                     | Forward: GGATTTCCCTGGGTCTTCCG<br>Reverse: TTCAGCCGTCCCTTGATTCC        |
| <i>Mrps21</i>                    | Forward: ATAAGTCGACGACGCTACTATG<br>Reverse: GCCATTTCCATGTTGTAGATCC    |
| <i>Mrpl14</i>                    | Forward: GAATGACCCCAAAGTTTGACTC<br>Reverse: GCTGGTCGGGATAGGTATTTTA    |
| <i>Ndufa6</i>                    | Forward: CTTAATGCAGCTGGATATCACG<br>Reverse: TTCCCTTAATGACCAGCAGAT     |
| <i>Ndufb3</i>                    | Forward: CCCGAGGGCTGAGGGAT<br>Reverse: TGCAAAGCCGCCCATG               |
| <i>Ndufb7</i>                    | Forward: GCCGGACCTCGGCTTT<br>Reverse: CTGGGCATCCATCATCTCTTG           |
| <i>Sdhb</i>                      | Forward: CGCTGCCACACCATCATG<br>Reverse: TTTCCGCAATCGCTTTCC            |
| <i>Uqcrrh</i>                    | Forward: AGGACGAACGAAAGATGCTCACTG<br>Reverse: CGGGCCTTTACACACTTCTCCAG |
| <i>Uqcrrq</i>                    | Forward: CGTTTGTAGTGGTCTACCTGAT<br>Reverse: ATACATGGCTGGATTCTTCCTT    |
| <i>Cox4i1</i>                    | Forward: TACTTCGGTGTGCCTTCGA<br>Reverse: TGACATGGGCCACATCAG           |
| <i>Atp5l</i>                     | Forward: TGCTGAAATCCCTACAGCTATT<br>Reverse: GCACAGCTTCCTTAACTGTAAG    |
| <i>Ppard</i>                     | Forward: TGGAGCTCGATGACAGTGAC<br>Reverse: GTECTGGCTGTCAGGGTGGT        |
| <i>Ppara</i>                     | Forward: ATGCCAGTACTGCCGTTTTTC<br>Reverse: GGCCTTGACCTTGTTTCATGT      |
| <i>Ppargc1a</i> ( <i>Pgc1a</i> ) | Forward: GGATATACTTTACGCAGGTCGA<br>Reverse: CGTCTGAGTTGGTATCTAGGTC    |
| <i>Cd36</i> ( <i>Fatp</i> )      | Forward: GAGCCTTCACTGTCTGTTGGAA<br>Reverse: CTGCTACAGCCAGATTCAGAAC    |
| <i>Cpt1b</i>                     | Forward: GGCACCTCTTCTGCCTTTAC                                         |

|                      |                                 |
|----------------------|---------------------------------|
|                      | Reverse: TTTGGGTCAAACATGCAGAT   |
| <i>Acox1</i>         | Forward: GGGAGTGCTACGGGTTACATG  |
|                      | Reverse: CCGATATCCCCAACAGTGATG  |
| <i>Acadm</i>         | Forward: GATGCATCACCCCTCGTGTAAC |
|                      | Reverse: AAGCCCTTTTCCCCTGAA     |
| <i>Acadvl</i>        | Forward: TTACATGCTGAGTGCCAACATG |
|                      | Reverse: CGCCTCCGAGCAAAAGATT    |
| <i>Esrra(ERRα)</i>   | Forward: GGCACAAGGAGGAGGAGGATGG |
|                      | Reverse: AGGCAGAGGCGTTTGGGTAGAG |
| <i>Gsk3b</i>         | Forward: TGGTAGCATGAAAGTTAGCAGA |
|                      | Reverse: CTCTCGGTTCTTAAATCGCTTG |
| <i>Slc2a1(Glut1)</i> | Forward: GAAGAAGGTCACCATCTTGGAG |
|                      | Reverse: CGAAGATGCTCGTTGAGTAGTA |
| <i>Slc2a4(Glut4)</i> | Forward: TATTCAACCAGCATCTTCGAGT |
|                      | Reverse: GTCCAGCTCGTTCTACTAAGAG |
| <i>Hk1</i>           | Forward: AGTGGAAGCCAGCTTTTTGA   |
|                      | Reverse: TTCAGCAGCTTGACCACATC   |
| <i>Gapdh</i>         | Forward: TGTGTCCGTCGTGGATCTGA   |
|                      | Reverse: CCTGCTTCACCACCTTCTTGA  |

---

Abbreviation: Nppa, natriuretic peptide type A; Nppb, natriuretic peptide type B; Myh7, myosin heavy chain 7; Acta1, actin alpha 1, skeletal muscle; Rps27a, ribosomal protein S27A; Rpl23, ribosomal protein L23; Mrps21, mitochondrial ribosomal protein S21; Mrpl14, mitochondrial ribosomal protein L14; Ndufa6, NADH:ubiquinone oxidoreductase subunit A6; Ndufb3, NADH:ubiquinone oxidoreductase subunit B3; Ndufb7, NADH:ubiquinone oxidoreductase subunit B7; Sdhb, succinate dehydrogenase complex, subunit B, iron sulfur (Ip); Uqcrh, ubiquinol-cytochrome c reductase hinge protein; Uqcrcq, ubiquinol-cytochrome c reductase, complex III subunit VII; Cox4i1, cytochrome c oxidase subunit 4I1; Atp5l, ATP synthase, H<sup>+</sup> transporting, mitochondrial F0 complex, subunit G; Ppard, peroxisome proliferator activated receptor delta; Ppara, peroxisome proliferator activated receptor alpha; Ppargc1a, peroxisome proliferative activated receptor, gamma, coactivator 1 alpha; Cd36, also known as fatty acid translocase (FAT); Acox1, acyl-Coenzyme A oxidase 1, palmitoyl; Acadm, acyl-Coenzyme A dehydrogenase, medium chain; Acadvl, acyl-Coenzyme A dehydrogenase, very long chain; Slc2a1, solute carrier family 2 member 1, also known as glucose transporter 1 (Glut1); Slc2a4, solute carrier family 2 member 4, also known as glucose transporter 4 (Glut4); Hk1, hexokinase 1; Gapdh, glyceraldehyde-3-phosphate dehydrogenase; Esrra, estrogen related receptor alpha; Gsk3b, glycogen synthase kinase 3 beta.

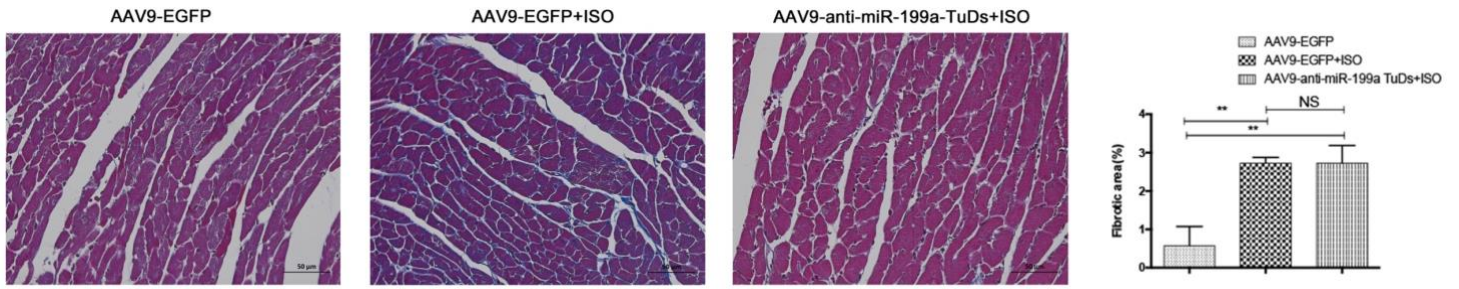

**Figure S1.** Masson staining of cardiac fibrosis of cardiomyocyte in each group. Bars, 50  $\mu$ m. Fibrosis ratio is calculated by the ratio of the blue-stained interstitial fibrotic areas and the red-stained whole cardiomyocyte area. \*:  $P < 0.05$ , \*\*:  $P < 0.01$ , NS, not significant.

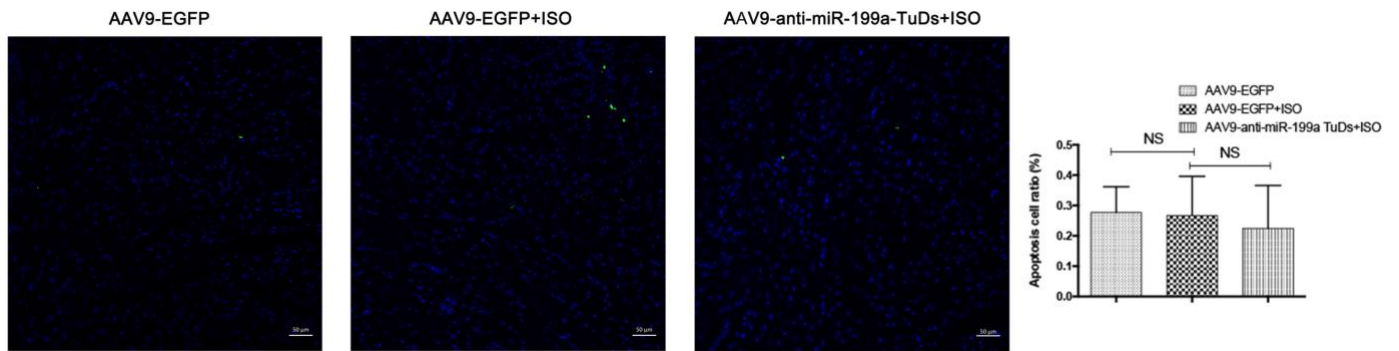

**Figure S2.** TUNEL detection of apoptosis of cardiomyocyte in each group. Blue, DAPI staining of nuclei; Green, cell apoptosis detected by TUNEL kit. Bars, 50  $\mu$ m. Apoptosis cell ratio is calculated by the ratio of TUNEL positive cells and DAPI cells. TUNEL, terminal deoxynucleotidyl transferase-mediated nick-end labeling; NS, not significant.

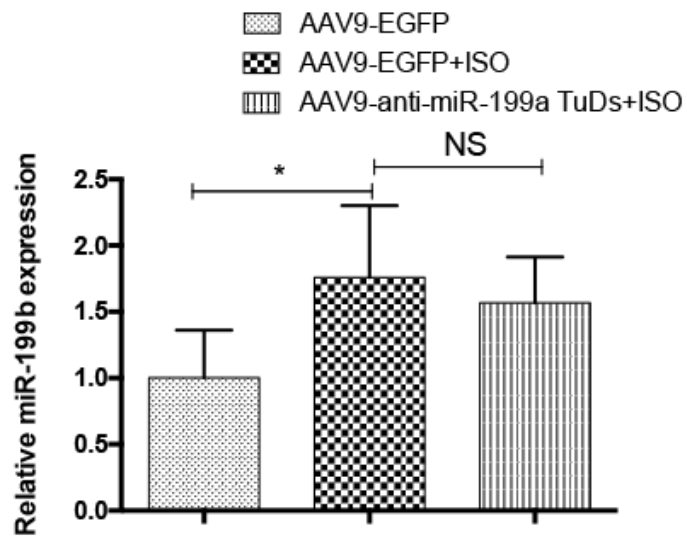

**Figure S3.** miR-199b expression level detected by real-time PCR. \*  $P < 0.05$ .

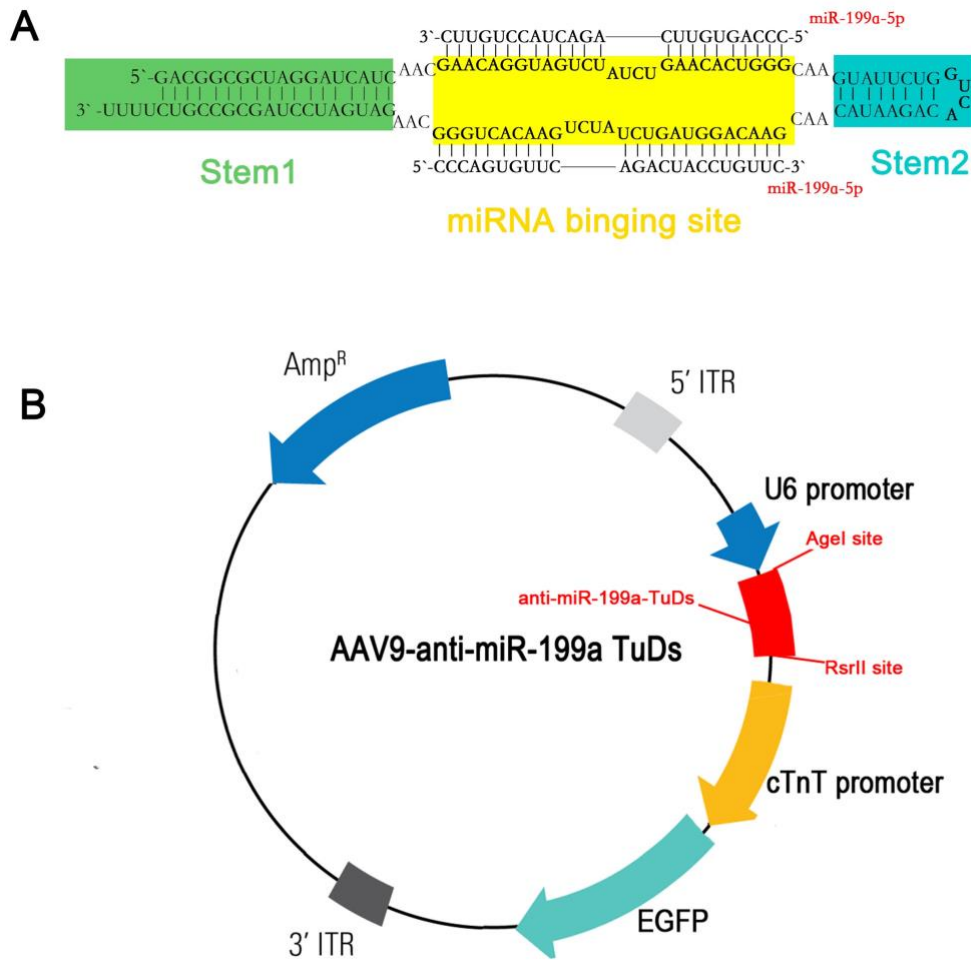

**Figure S4.** Schematic diagram of AAV9-anti-miR-199a TuDs plasmid. (A) the harpin structure of anti-miR-199a TuDs insert contains two single-stranded miR-199a-5p binding sites (yellow sequences) and two double-stranded stems (green and blue sequences). (B) AAV9-anti-miR-199a TuDs plasmid harbors the U6 promoter and the chicken cardiac TNT promoter, to generate anti-miR-199a TuDs and EGFP, respectively. ITR, inverted terminal repeat. TuDs, tough decoys.
